# Supplementary material for: Comparative Proteomics of Two Life Cycle Stages of Stable Isotope-labeled Trypanosoma brucei Reveals Novel Components of the Parasite's Host Adaptation Machinery
Source: PubMed Central journal article supplement — Mol Cell Proteomics. 2012 Oct 22;12(1):172–9. doi: 10.1074/mcp.M112.019224 (PMC3536898; doi:10.1074/mcp.m112.019224), 2012-10-22
Supplement: supp_M112.019224_mcp.M112.019224-2.pdf [file supp_M112.019224_mcp.M112.019224-2.pdf]

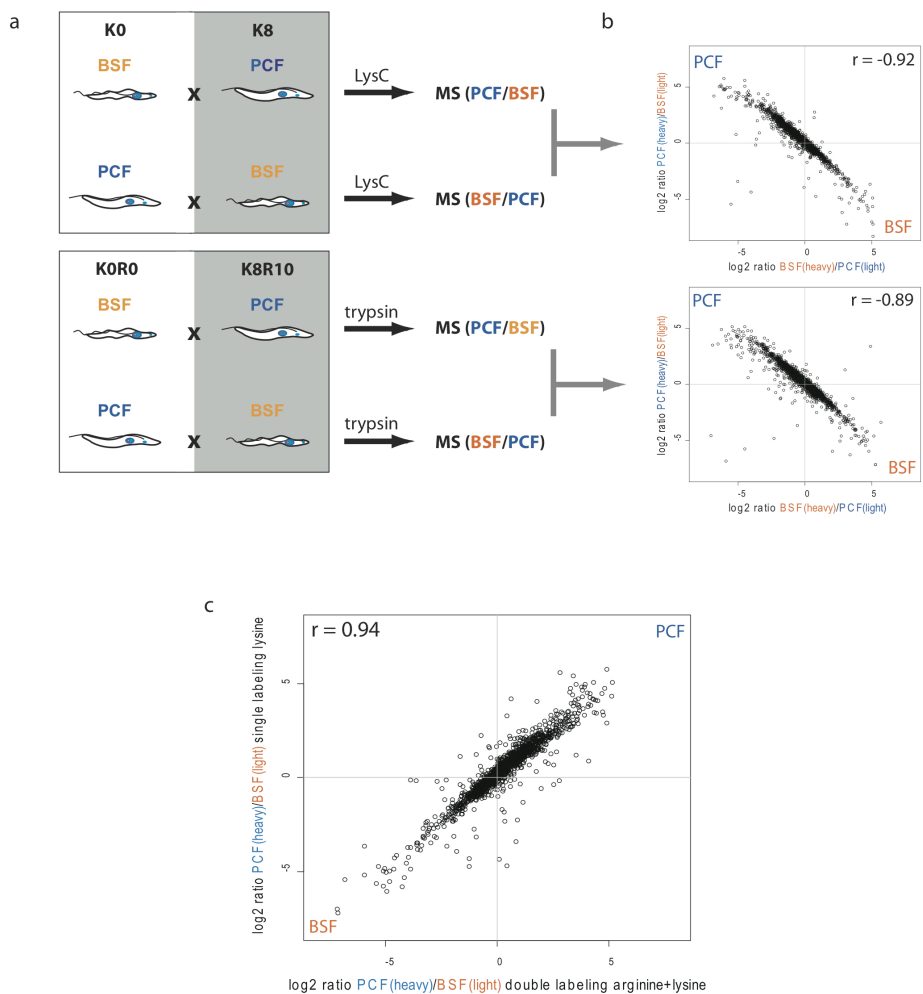

**Supplementary Figure 2:** (a) Equal number ( $10^7$  cells) of PCF and BSF trypanosomes with different labels were mixed, digested with LysC (single labeling) or trypsin (double labeling). (b) Correlation between the label-switch experiments for single label (upper panel) and double labeling (lower panel). (c) Correlation of the PCF/BSF ratios between the single and double-labeled measurement.
