# Supplementary material for: Comparative Proteomics of Two Life Cycle Stages of Stable Isotope-labeled Trypanosoma brucei Reveals Novel Components of the Parasite's Host Adaptation Machinery
Source: PubMed Central journal article supplement — Mol Cell Proteomics. 2012 Oct 22;12(1):172–9. doi: 10.1074/mcp.M112.019224 (PMC3536898; doi:10.1074/mcp.m112.019224), 2012-10-22
Supplement: supp_M112.019224_mcp.M112.019224-3.pdf [file supp_M112.019224_mcp.M112.019224-3.pdf]

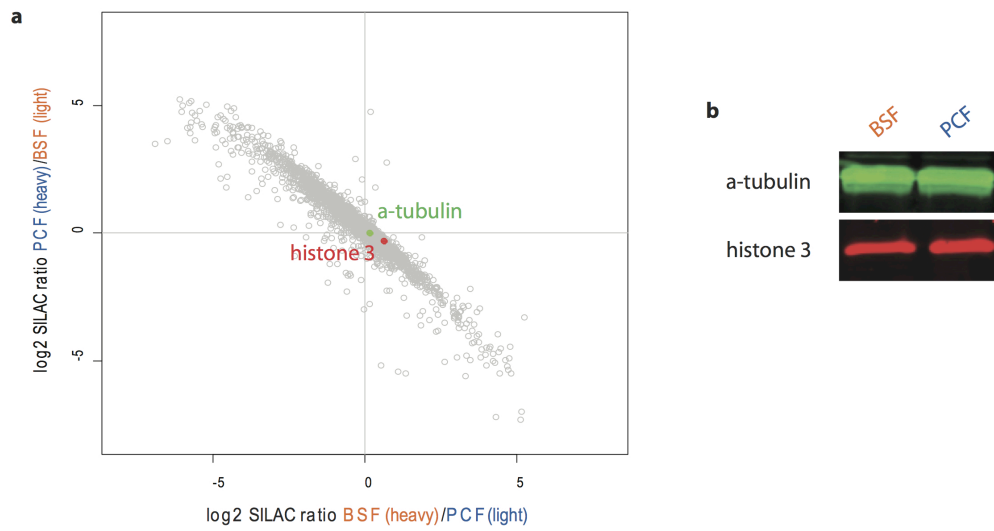

**Supplementary Figure 3:** Structural and DNA packaging proteins are equally expressed in the two stages. (a) Plot of the SILAC ratios between PCF and BSF life cycle stage with label-switch.  $\alpha$ -tubulin (green) and histone H3 (red) have a SILAC ratio of around 1 and are not specifically enriched. (b) Western blot with antibodies against  $\alpha$ -tubulin and histone H3.
